# Supplementary material
Source: Springer Nature journal article supplement (https://www.springermedizin.de/resource/supplementary/12889_2010_2369_MOESM1_ESM.pdf/9485564)
Supplement: MOESM1 [file 9485564]

- Patients with established athero-thrombotic cardiovascular disease
- Patients with an estimated  $\geq 15\%$  5-year risk of a cardiovascular event

n=1000

Randomisation

Treatment strategy based  
on the polypill  
n=500

Continued  
“usual care”  
n=500

Scheduled end of follow-up (average 18  
months)
